# Supplementary material for: Impaired diversity of the lung microbiome predicts progression of idiopathic pulmonary fibrosis
Source: Springer Nature journal article supplement (doi:10.1186/s12931-018-0736-9), 2018-02-27

## **ADDITIONAL FILE**

### **Impaired Diversity of the Lung Microbiome Predicts Progression of Idiopathic Pulmonary Fibrosis**

Youhei Takahashi, MD, Atsushi Saito, MD, PhD, Hirofumi Chiba, MD, PhD, Koji Kuronuma, MD, PhD, Kimiyuki Ikeda, MD, Tomofumi Kobayashi, MD, Shigeru Arika, PhD, Motoko Takahashi, MD, PhD, Yasushi Sasaki, MD, PhD and Hiroki Takahashi, MD, PhD

## **RESULTS**

**Table S1**

**Figure S1**

**Figure S2**

**Figure S3**

**Figure S4**

**Figure S5**

## RESULTS

**Table S1.** Overview of DNA sequencing data.

| No. | Number of sequences | OTU's | Shannon | Simpson 1-D |
|-----|---------------------|-------|---------|-------------|
| 1   | 110507              | 56    | 3.551   | 0.850       |
| 2   | 77345               | 56    | 3.347   | 0.786       |
| 3   | 55954               | 76    | 4.411   | 0.910       |
| 4   | 112968              | 73    | 3.594   | 0.843       |
| 5   | 77465               | 60    | 3.281   | 0.727       |
| 6   | 82966               | 83    | 4.251   | 0.879       |
| 7   | 95462               | 77    | 4.331   | 0.922       |
| 8   | 124723              | 82    | 4.411   | 0.917       |
| 9   | 74019               | 66    | 3.906   | 0.867       |
| 10  | 128326              | 81    | 4.289   | 0.910       |
| 11  | 105223              | 83    | 4.233   | 0.906       |
| 12  | 109226              | 90    | 4.063   | 0.867       |
| 13  | 67001               | 60    | 3.497   | 0.850       |
| 14  | 55782               | 54    | 3.665   | 0.844       |
| 15  | 104216              | 61    | 4.086   | 0.910       |
| 16  | 40089               | 70    | 4.437   | 0.917       |
| 17  | 136355              | 74    | 4.110   | 0.906       |
| 18  | 73021               | 85    | 4.393   | 0.911       |
| 19  | 108241              | 79    | 4.126   | 0.903       |
| 20  | 115102              | 77    | 4.096   | 0.894       |
| 21  | 67413               | 69    | 3.676   | 0.820       |
| 22  | 102943              | 75    | 4.027   | 0.886       |
| 23  | 134002              | 68    | 2.817   | 0.729       |
| 24  | 99271               | 80    | 4.327   | 0.900       |
| 25  | 132216              | 85    | 4.323   | 0.916       |
| 26  | 75136               | 85    | 3.777   | 0.844       |
| 27  | 65428               | 85    | 4.643   | 0.936       |
| 28  | 75670               | 93    | 4.151   | 0.880       |
| 29  | 84220               | 90    | 4.515   | 0.929       |
| 30  | 124375              | 82    | 4.083   | 0.899       |
| 31  | 86017               | 73    | 4.424   | 0.925       |
| 32  | 29956               | 47    | 3.649   | 0.840       |
| 33  | 136339              | 83    | 4.293   | 0.911       |
| 34  | 77948               | 80    | 4.632   | 0.931       |

**Figure S1.** Comparison of the total bacterial genes between the AE and non-AE groups.

There is no statistical difference, but the median of the AE group is slightly higher than that of the non-AE group. Box plots are expressed as the median  $\pm$  IQRs,  $p=0.25$ , Mann–Whitney U test.

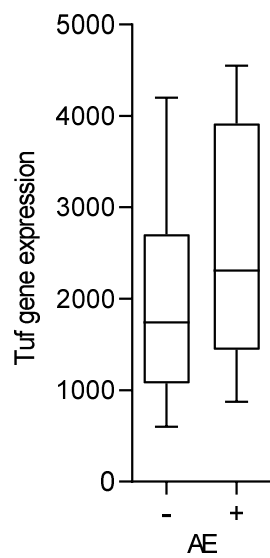

**Figure S2.** Rarefaction curves were calculated, which suggests that all expected OTUs have been observed.

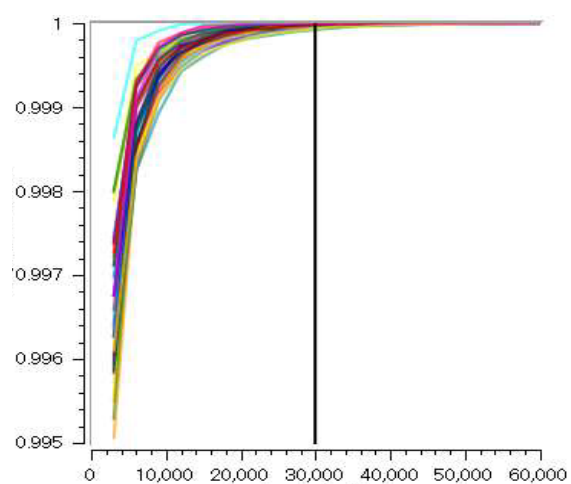

**Figure S3.** The concentration of SP-A in BALF correlates well with the relative abundance of Veillonellaceae, but not serum SP-A.  $P=0.0184$  and  $0.9051$ ,  $\rho=0.4022$  and  $-0.0212$ , respectively. Spearman's test.  $\rho$ : Spearman rank-correlation coefficient.

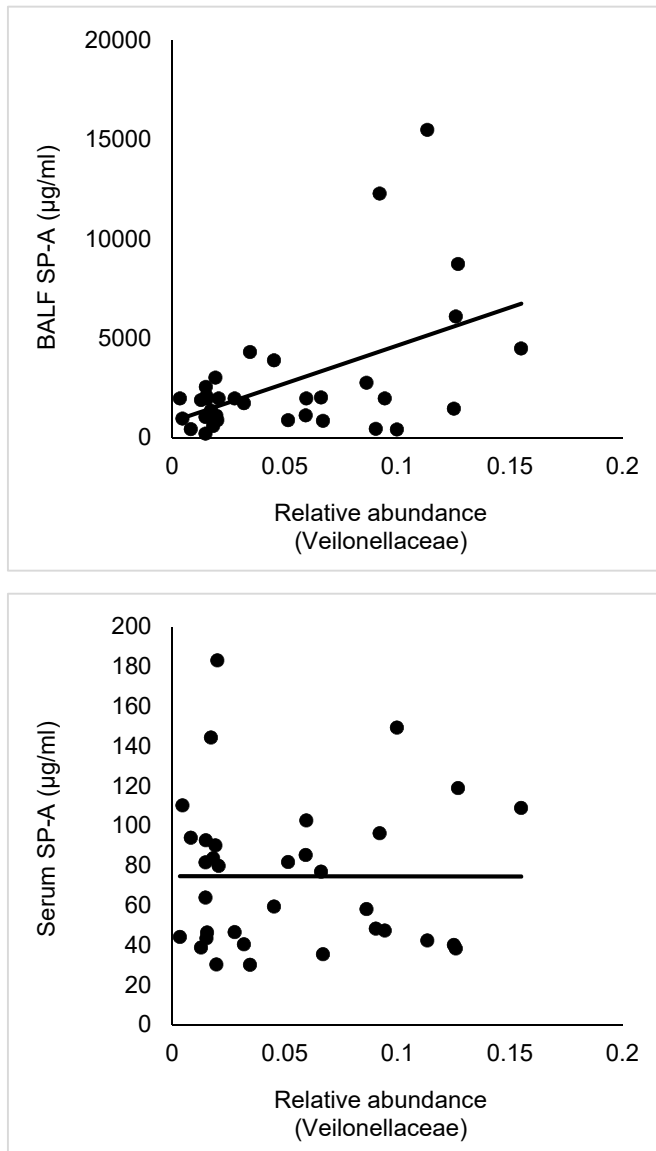

**Figure S4.** The relative abundance of family Streptococcaceae also correlated with 6MWD.  $P=0.0030$ ,  $\rho=-0.5008$ . Spearman's test.  $\rho$ : Spearman rank-correlation coefficient.

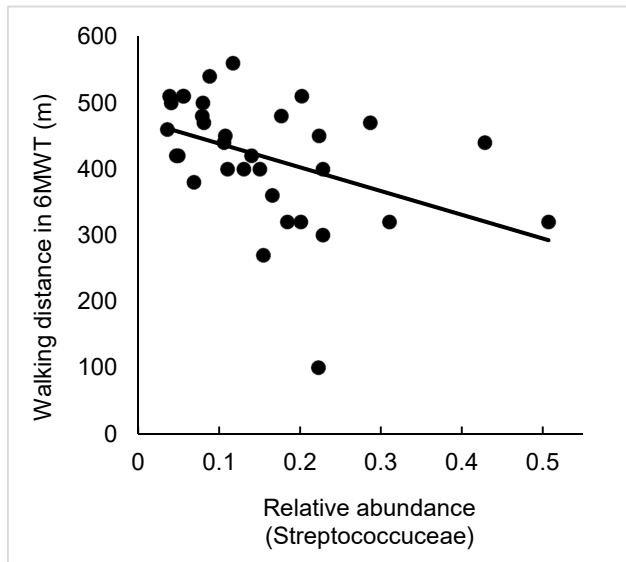

**Figure S5.** Histopathological assessment and BAL cell counts in mice with the bleomycin-induced lung fibrosis. (A) Lung sections from bleomycin-treated mice were stained with Hematoxylin-Eosin and Masson's trichrome reagent. Representative images are shown. (B, C) The number of total cells and differential cells in bronchoalveolar lavage fluid from bleomycin- (Bleo) and saline-treated (NS) mice were counted. Neutrophils (Neut), Lymphocytes (Lymph), Macrophages (Mac), Eosinophils (Eo) and Basophiles (Baso). Box plots are expressed as the median  $\pm$  IQRs, (n=6 mice per group), Mann–Whitney U test, \*:  $p < 0.05$ , \*\*:  $p < 0.01$ .

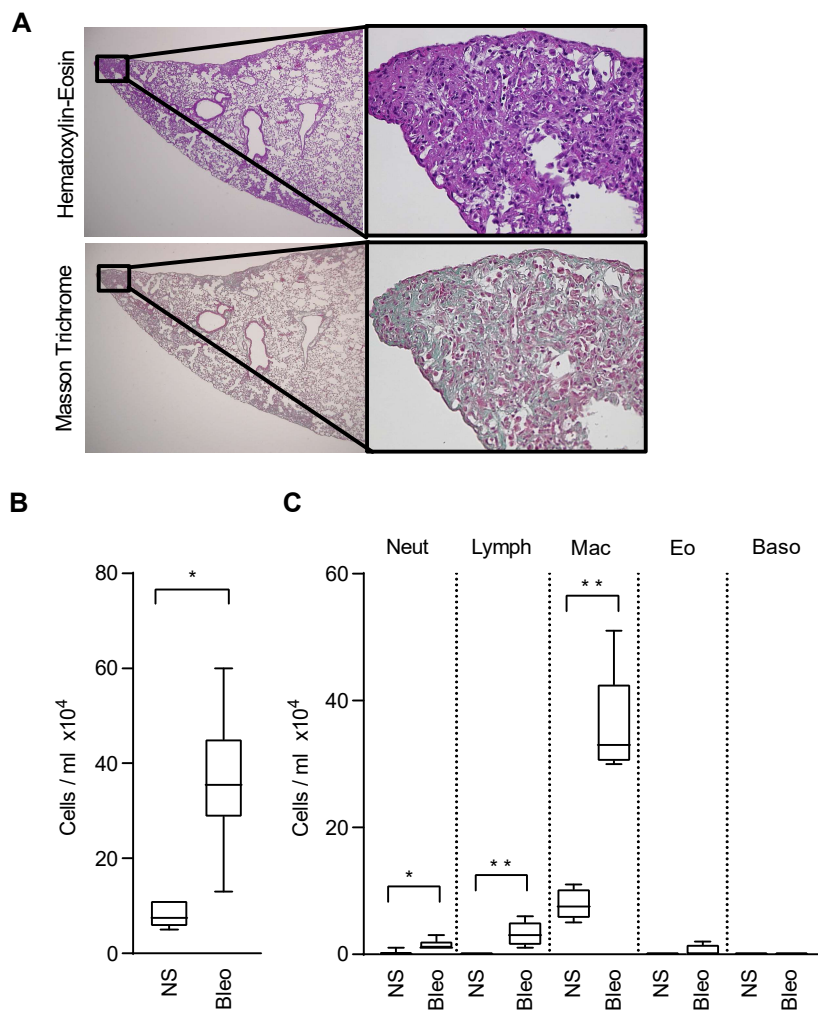

Supplement: MOESM1 [file 15494870]
